# Supplementary material for: Cell-Free Protein Synthesis From Fast-Growing Vibrio natriegens
Source: PubMed Central journal article supplement (PMC5992293; doi:10.3389/fmicb.2018.01146), 2018-06-01
Supplement: Presentation_1.pdf [file Presentation_1.pdf]

# Cell-free protein synthesis from fast-growing *Vibrio natriegens*

## Authors

Jurek Failmezger<sup>#</sup>, Steffen Scholz<sup>#</sup>, Bastian Blombach, Martin Siemann-Herzberg\*

Institute of Biochemical Engineering  
University of Stuttgart  
Stuttgart, Germany

<sup>#</sup> equal contribution

\*Corresponding author

[siemann@ibvt.uni-stuttgart.de](mailto:siemann@ibvt.uni-stuttgart.de) (MSH)

## Supplementary Material

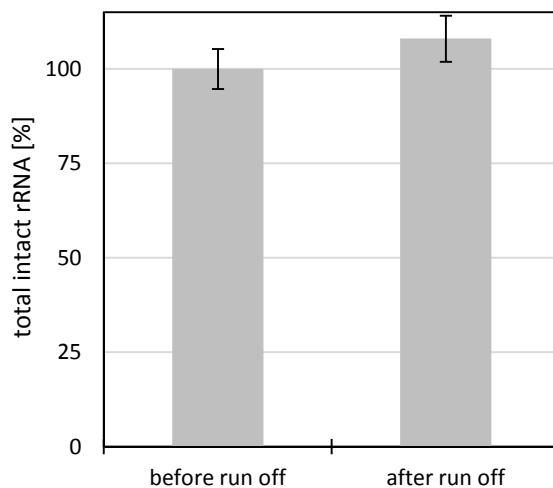

Figure S1: Amount of total intact rRNA determined before and after the run-off procedure.

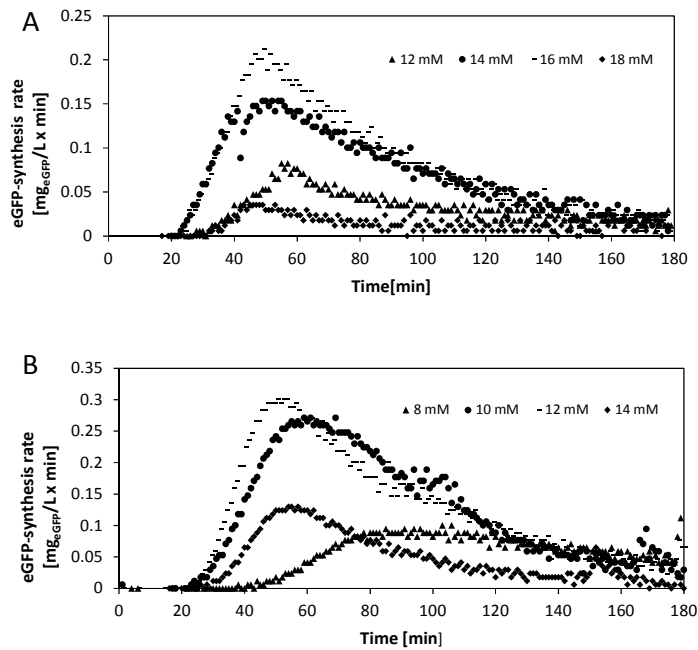

Figure S2: Cell-free protein synthesis by *Vibrio* fueled by (A) PEP and (B) pyruvate. Shown are the differential volumetric synthesis rates over the reaction time of eGFP at different concentrations of  $Mg^{2+}$ .

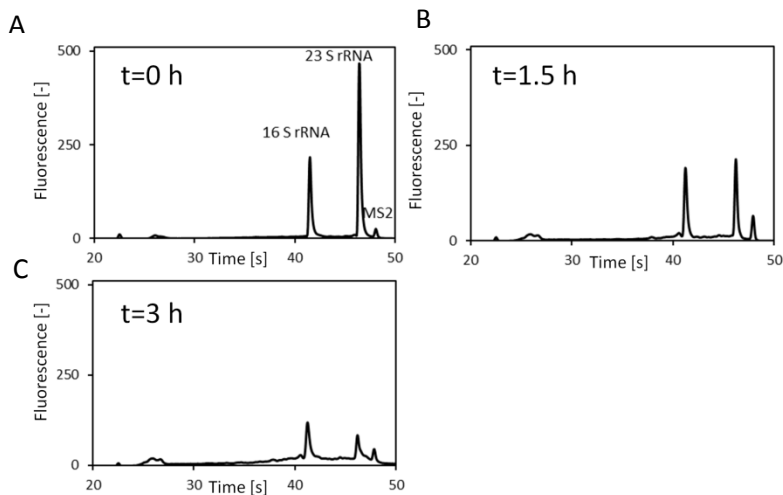

Figure S3: rRNA analysis by capillary gel electrophoresis with laser-induced fluorescence detection during a CFPS reaction fueled by creatine phosphate. Shown are the respective peaks for the 16S rRNA, 23S rRNA, and MS2 RNA (internal standard) at the start of the reaction (A), after 1.5 h (B) and after 3 h (C).
